# Supplementary material
Source: publisher site journal article supplement (https://www.dovepress.com/article/399105)
Supplement: Supplementary file 1 [file get_supplementary_file.php]

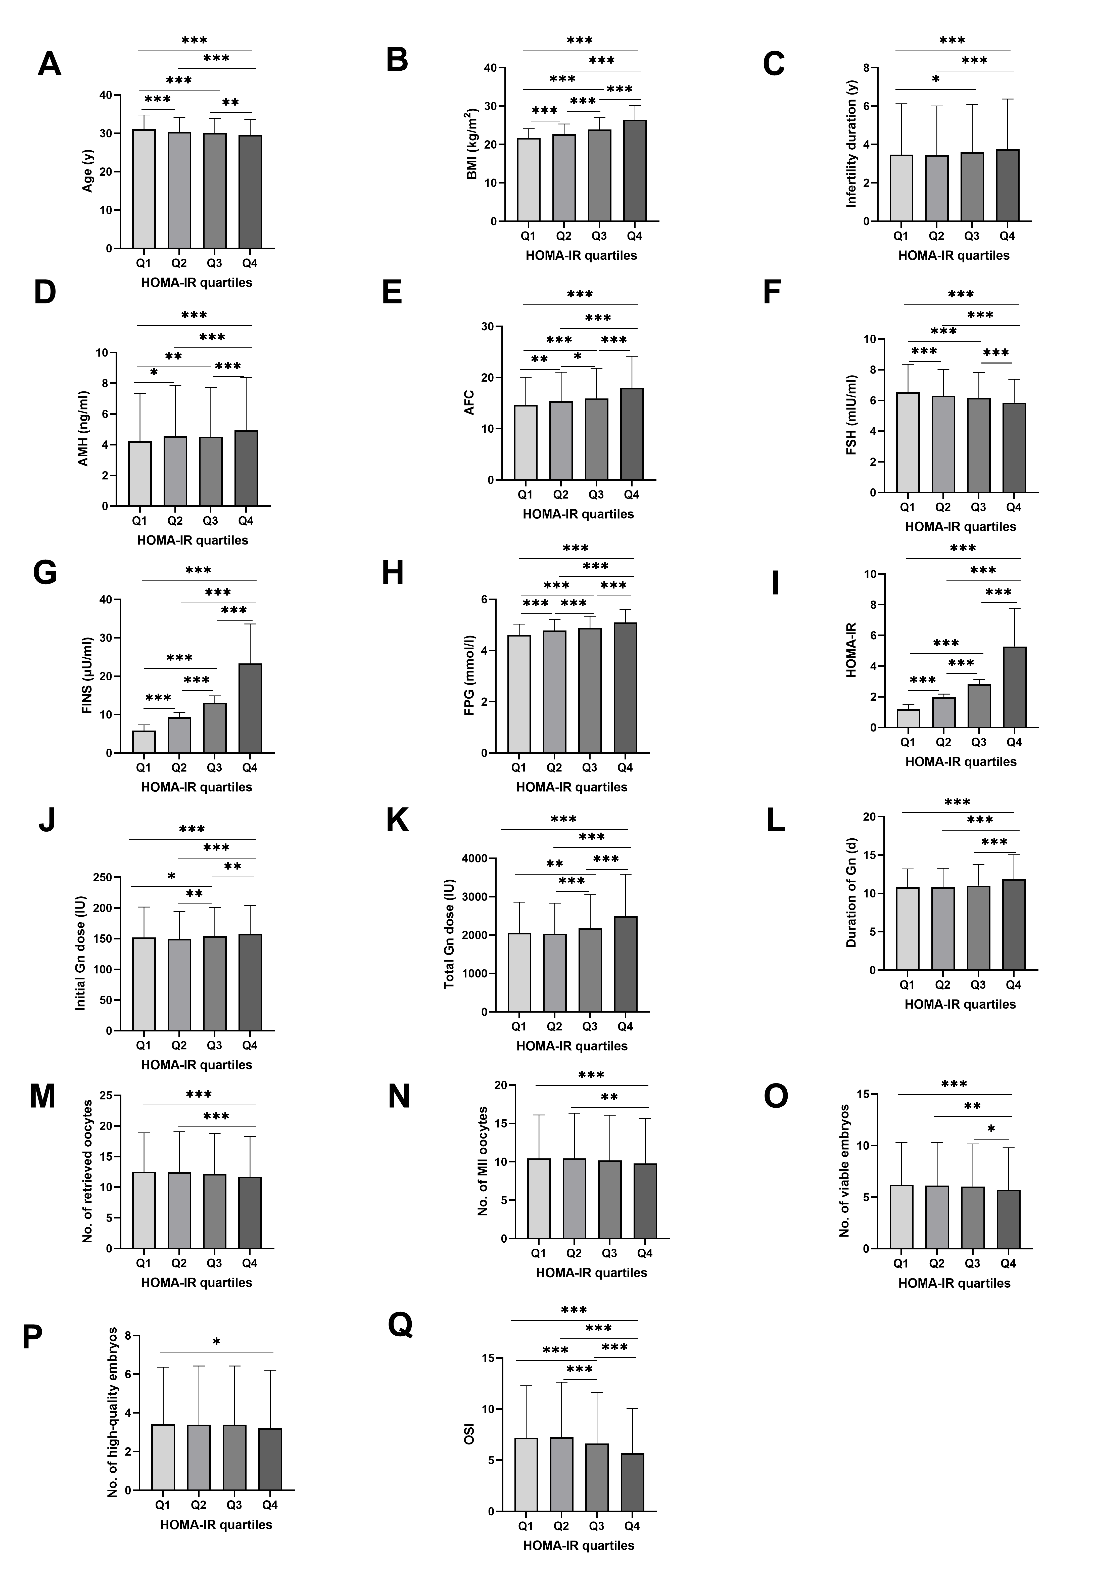
**Supplementary Figure S1** The post hoc analysis of quantitative clinical data in HOMA-IR quartile groups. (A) the post hoc analysis of age. (B) the post hoc analysis of BMI. (C) the post hoc analysis of infertility duration. (D) the post hoc analysis of AMH. (E) the post hoc analysis of AFC. (F) the post hoc analysis of basal FSH. (G) the post hoc analysis of FINS. (H) the post hoc analysis of FPG. (I) the post hoc analysis of HOMA-IR. (J) the post hoc analysis of initial Gn dose. (K) the post hoc analysis of total Gn dose. (L) the post hoc analysis of Gn duration. (M) the post hoc analysis of retrieved oocytes. (N) the post hoc analysis of MII oocytes. (O) the post hoc analysis of viable embryos. (P) the post hoc analysis of high-quality embryos. (Q) the post hoc analysis of OSI. **Note**: ∗p < 0.05. ∗∗p < 0.01. ∗∗∗ p < 0.001. **Abbreviations**: HOMA-IR, homeostatic model assessment of insulin resistance; BMI, Body Mass Index; AMH, anti-mullerian hormone; AFC, antral follicle count; FSH, follicle stimulating hormone; FINS, fasting serum insulin; FPG, fasting plasma glucose; Gn, gonadotropin.


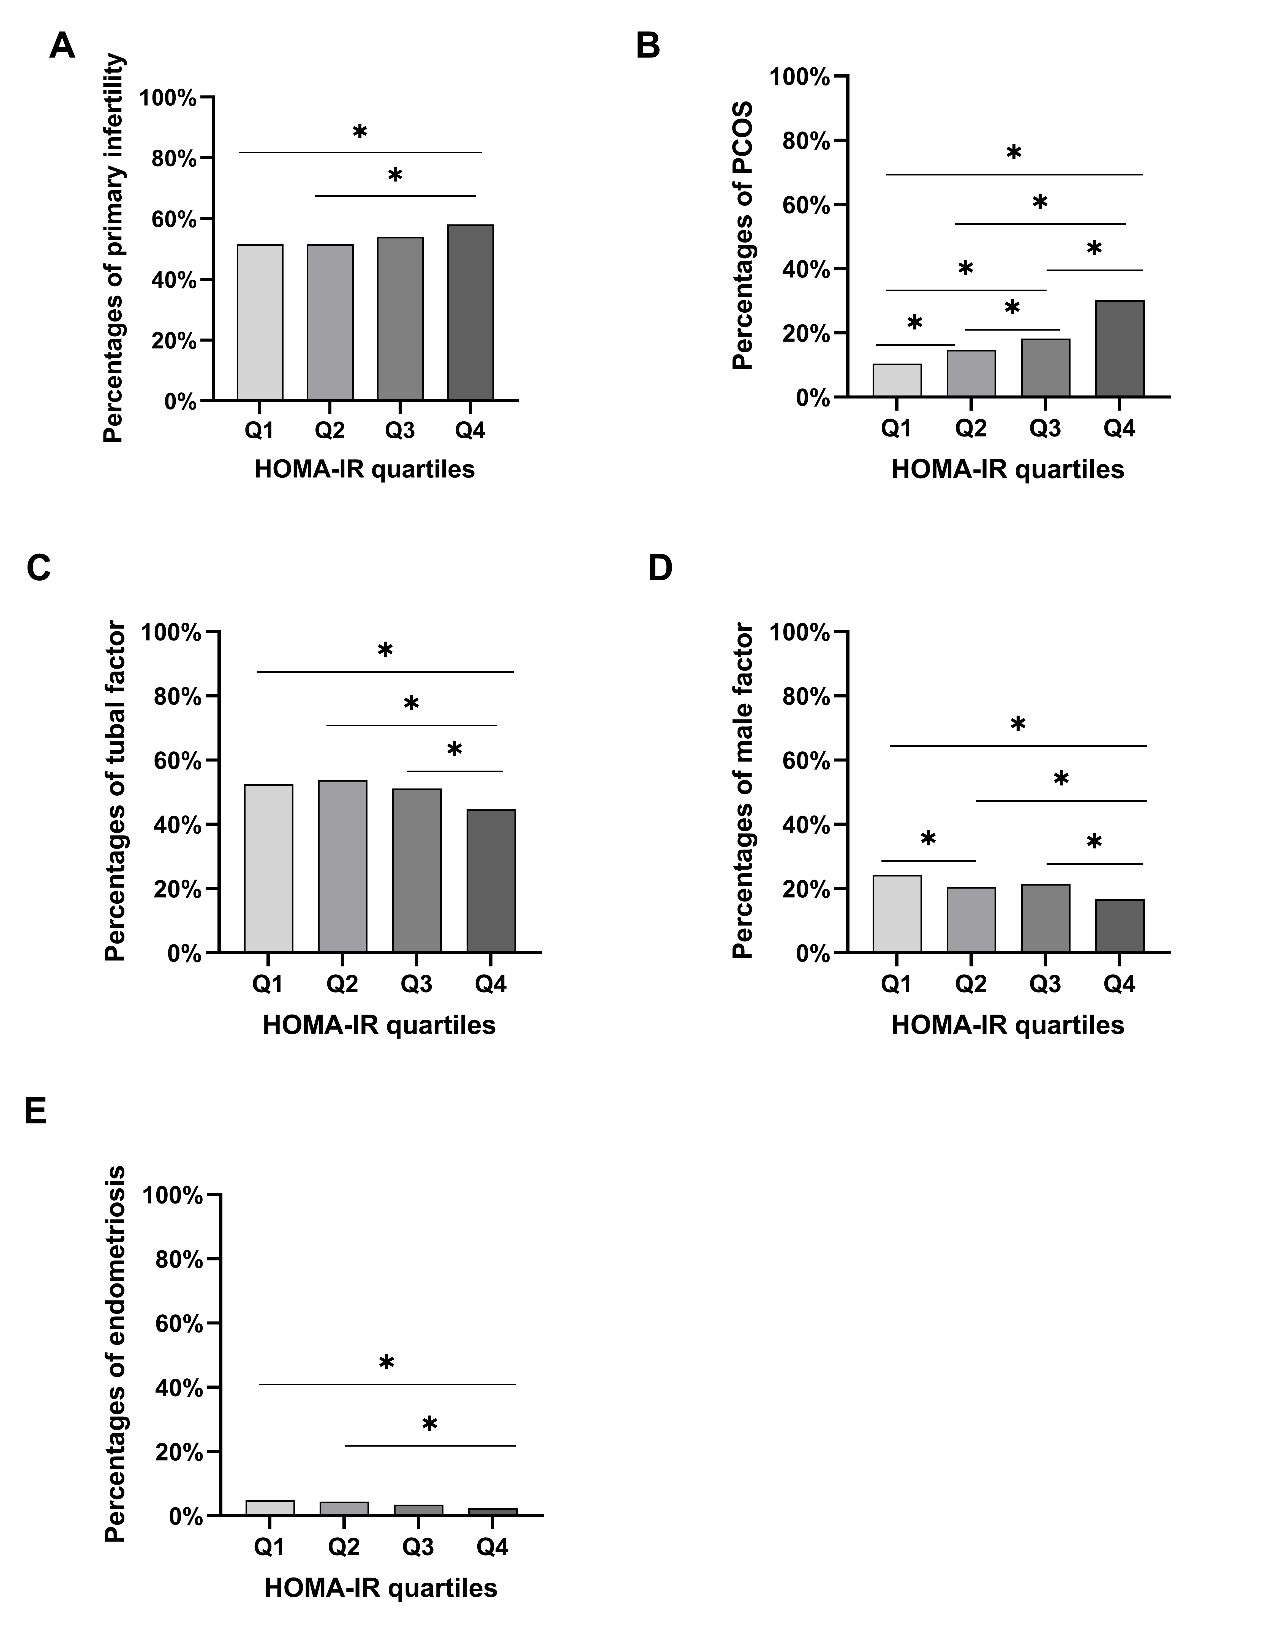


**Supplementary Figure S2** The post hoc analysis of qualitative clinical data in HOMA-IR quartile groups. (A) the post hoc analysis of percentages of primary infertility. (B) the post hoc analysis of percentages of PCOS. (C) the post hoc analysis of percentages of tubal factors. (D) the post hoc analysis of percentages of male factors. (E) the post hoc analysis of percentages of endometriosis. **Note**: ∗p < 0.05. **Abbreviations**: HOMA-IR, homeostatic model assessment of insulin resistance; PCOS, polycystic ovary syndrome.
